# Supplementary figures and images for: Evidence of reduced antiferromagnetic transition in mesocrystals of CuO synthesized by a surfactant-free solution phase method
Source: Royal Society of Chemistry journal article supplement (doi:10.1039/c5ce00928f), 2015-01-01

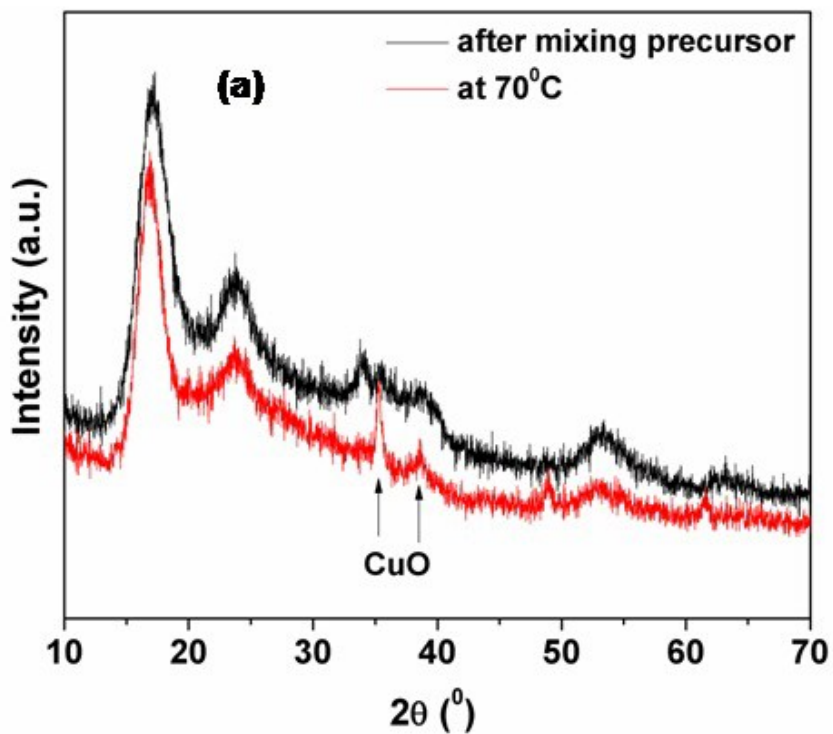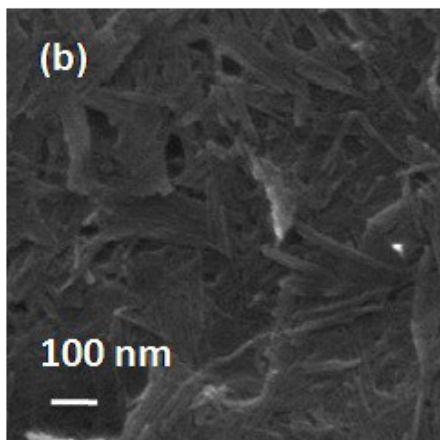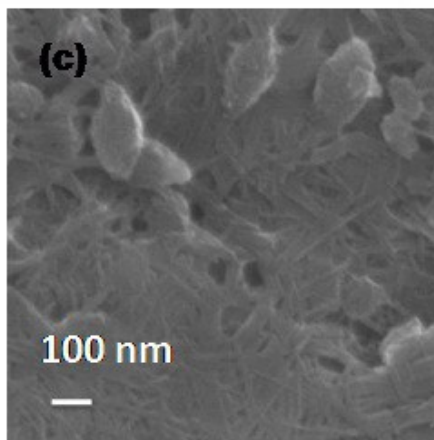

Supplement: c5ce00928f1.pdf [file c5ce00928f1.pdf]

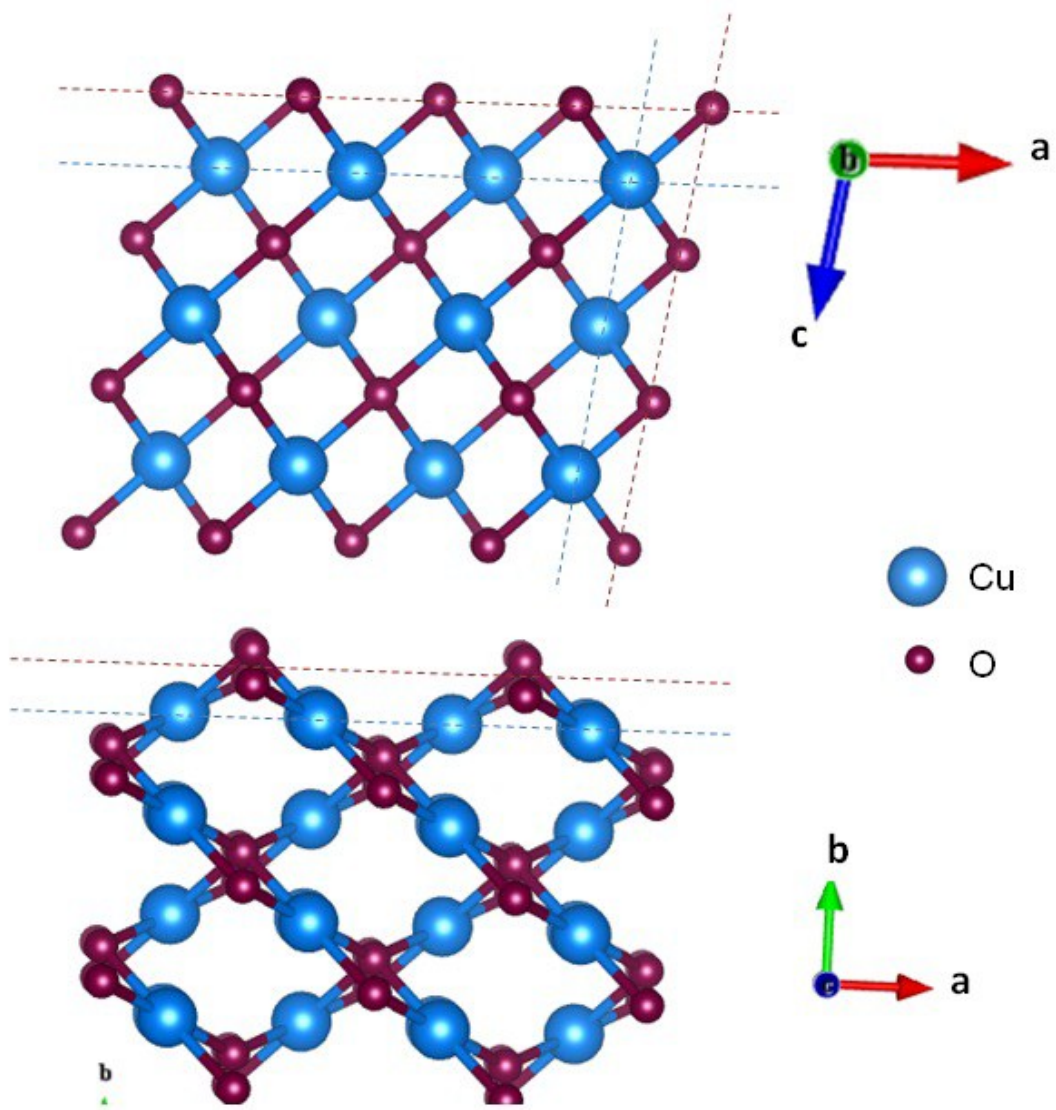

Supplement: c5ce00928f2.pdf [file c5ce00928f2.pdf]
